# Supplementary material for: A copper acetate/2-aminobenzenthiol complex supported on magnetite/silica nanoparticles as a highly active and recyclable catalyst for 1,2,3-triazole synthesis
Source: Royal Society of Chemistry journal article supplement (doi:10.1039/c5ra22909j), 2015-01-01
Supplement: c5ra22909j1.pdf [file c5ra22909j1.pdf]

## NMR Spectra of Compounds

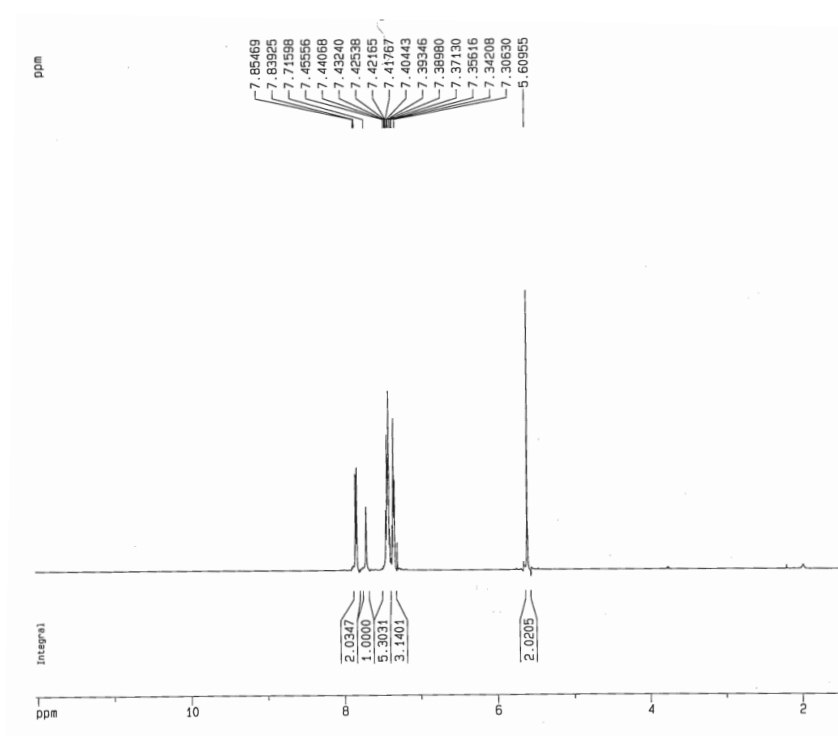

Fig.1 <sup>1</sup>H NMR (500MHz, CDCl<sub>3</sub>) of Benzyl-4-phenyl-1H-1, 2, 3-triazole (Table 2, Entry 1)

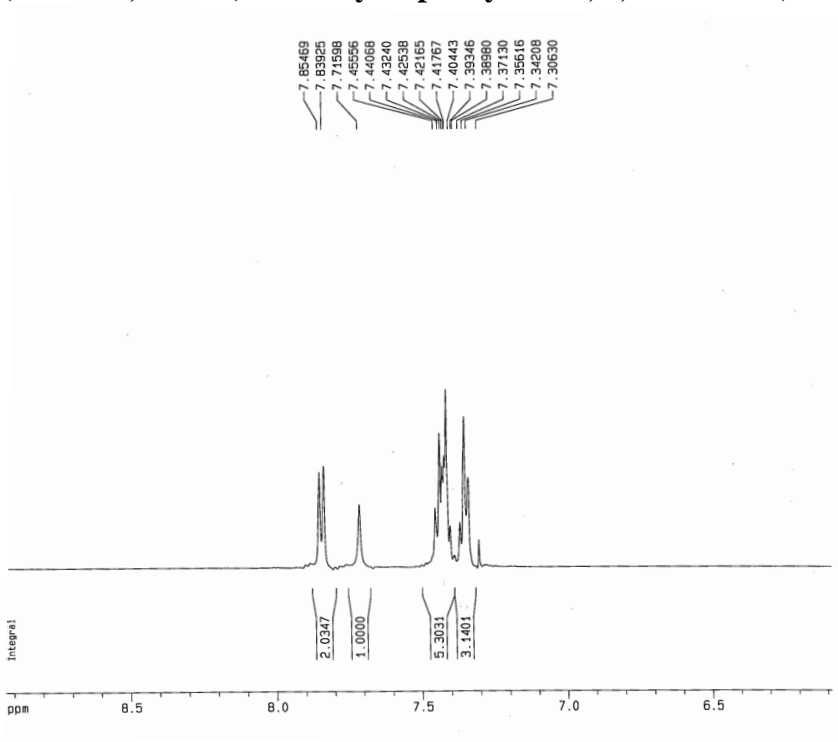

Fig.2 <sup>1</sup>H NMR (500MHz, CDCl<sub>3</sub>) of Benzyl-4-phenyl-1H-1, 2, 3-triazole (Table 2, Entry 1)

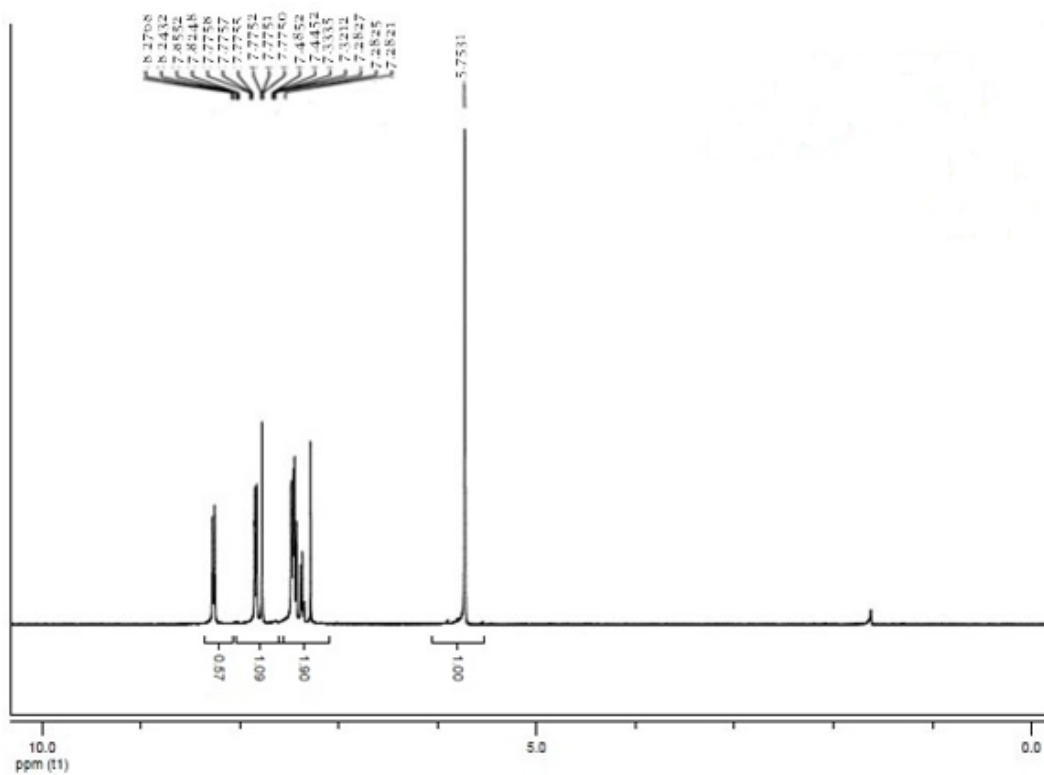

Fig.3  $^1\text{H}$ NMR (500MHz,  $\text{CDCl}_3$ ) of 1-(4-nitrobenzyl)-1H-1, 2, 3-triazole (Table 2, Entry 2)

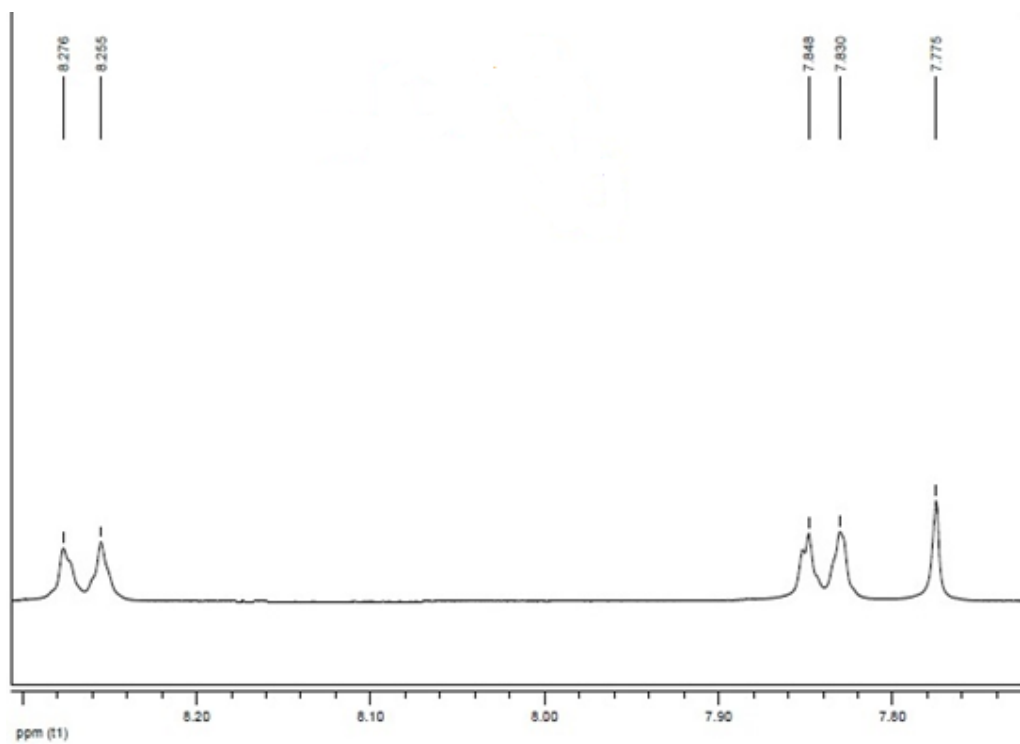

Fig.4  $^1\text{H}$ NMR (500MHz,  $\text{CDCl}_3$ ) of 1-(4- nitrobenzyl)-1H-1, 2, 3-triazole (Table 2, Entry 2)

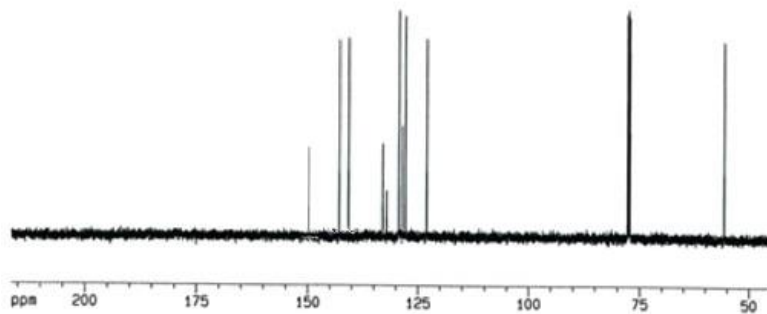

Fig.5  $^{13}\text{C}$ NMR (125MHz,  $\text{CDCl}_3$ ) of 1-(4-nitrobenzyl)-1H-1,2,3-triazole (Table 2, Entry 2)

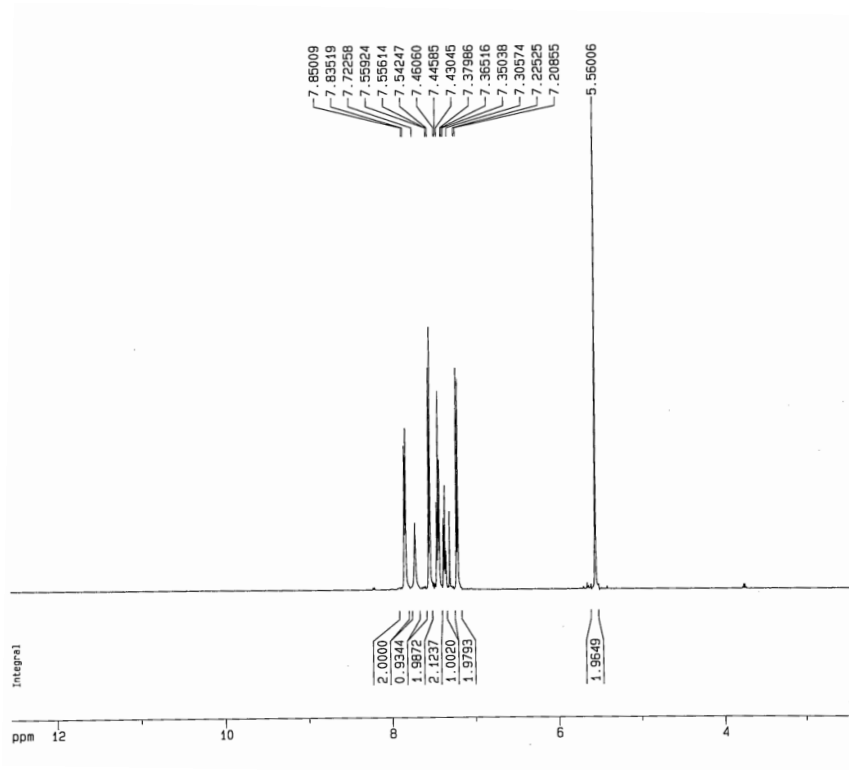

Fig.6  $^1\text{H}$ NMR (500MHz,  $\text{CDCl}_3$ ) of 1-(4-bromobenzyl)-4-phenyl-1H-1,2,3-triazole (Table 2, Entry 6)

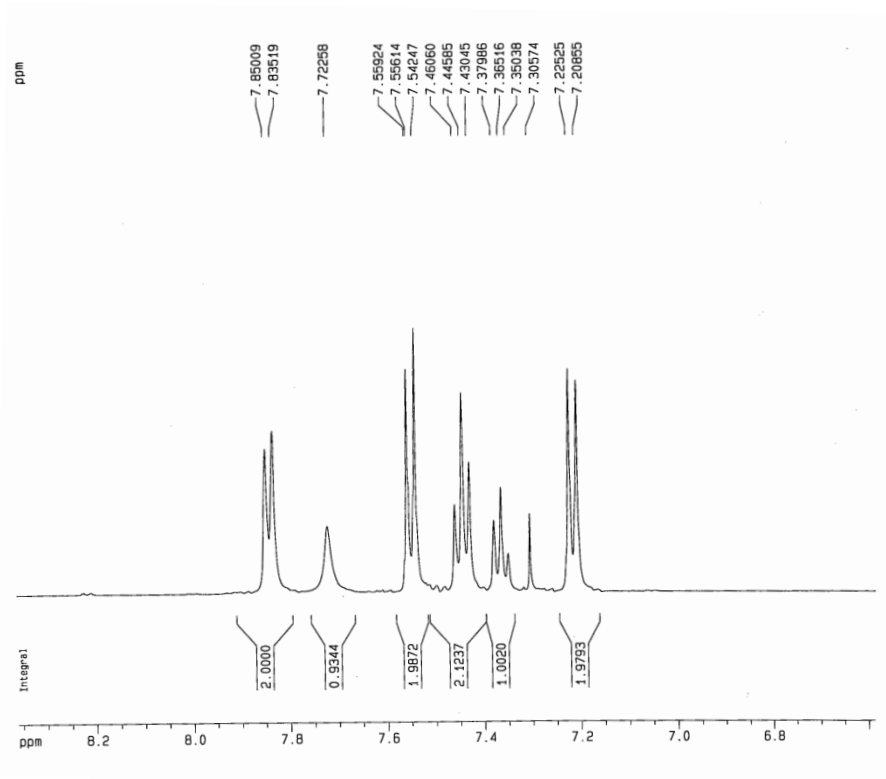

**Fig.7  $^1\text{H}$ NMR (500MHz,  $\text{CDCl}_3$ ) of 1-(4-bromobenzyl)-4-phenyl-1H-1, 2, 3-triazole (Table 2, Entry 6)**

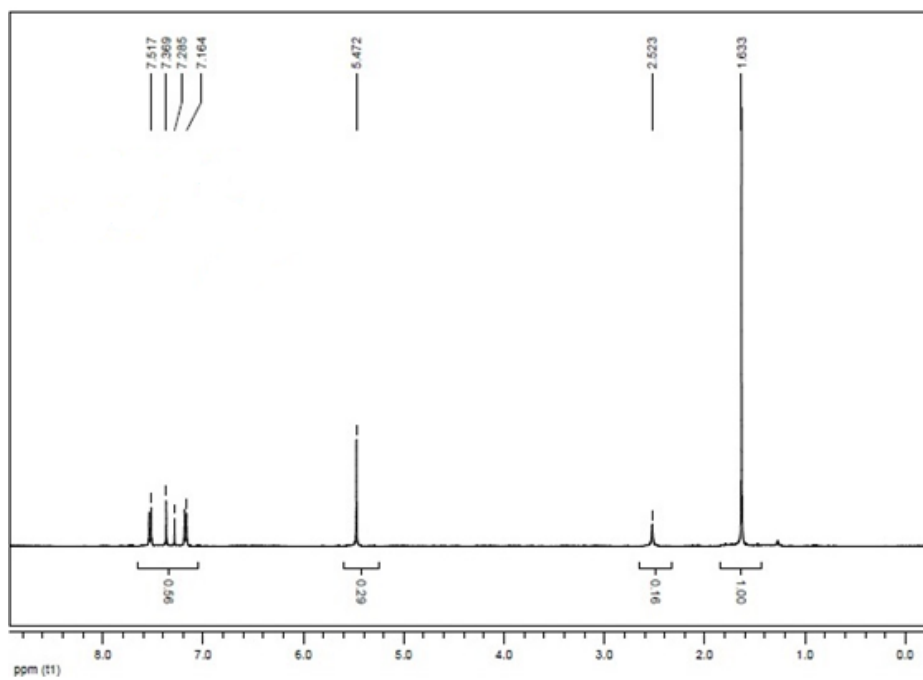

**Fig.8  $^1\text{H}$ NMR (500MHz,  $\text{CDCl}_3$ ) of 2-(1-(4-bromobenzyl)-1H-1, 2, 3-triazol-4-yl)propan-2-ol (Table 2, Entry 7)**

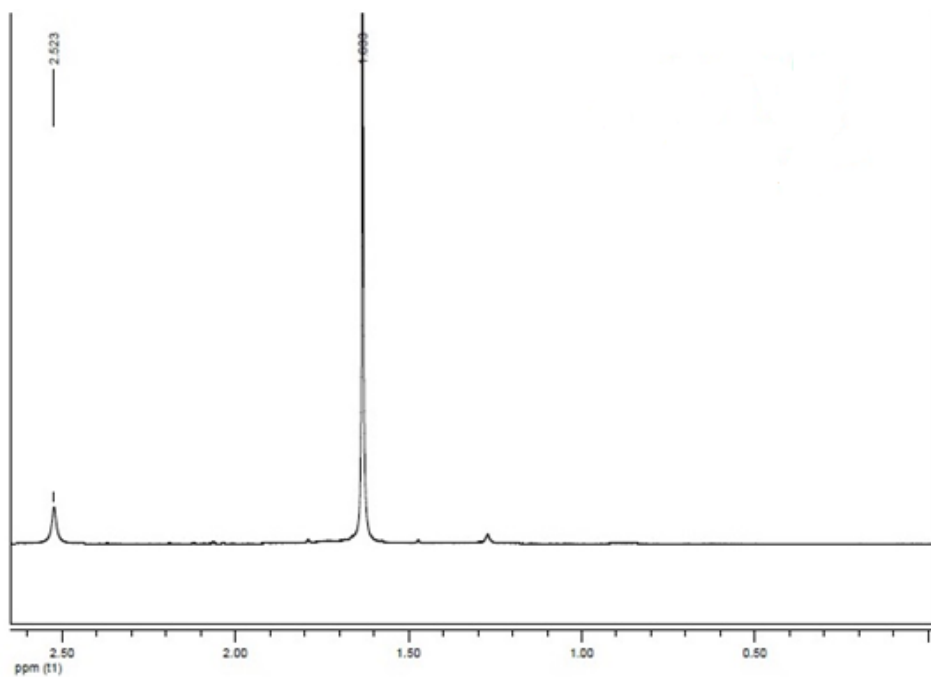

**Fig.9**  $^1\text{H}$ NMR (500MHz,  $\text{CDCl}_3$ ) of 2-(1-(4-bromobenzyl)-1H-1,2,3-triazol-4-yl)propan-2-ol (Table 2, Entry 7)

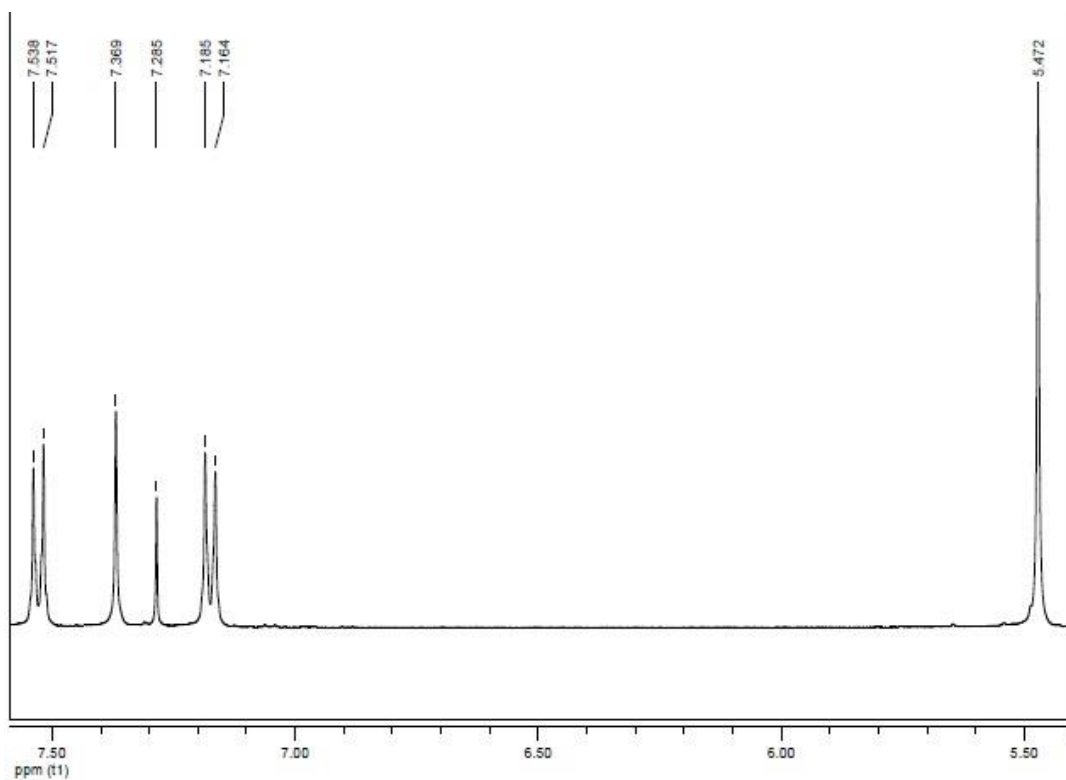

**Fig.10**  $^1\text{H}$ NMR (500MHz,  $\text{CDCl}_3$ ) of 2-(1-(4-bromobenzyl)-1H-1,2,3-triazol-4-yl)propan-2-ol (Table 2, Entry 7)

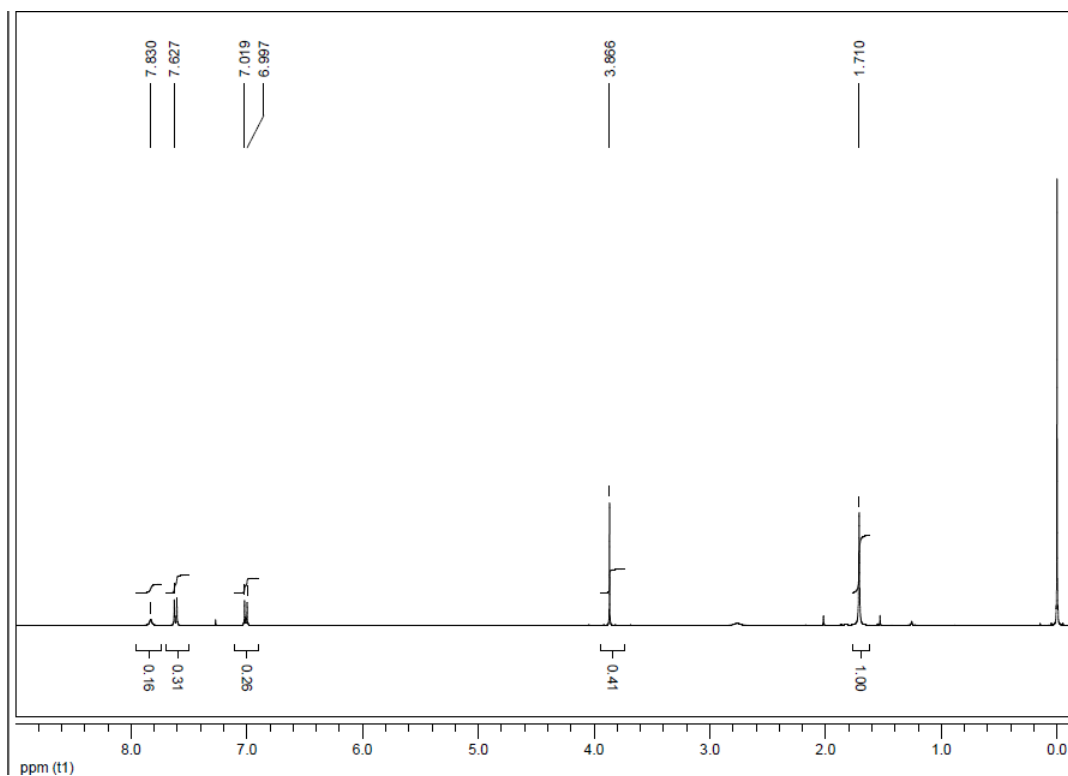

**Fig.11**  $^1\text{H}$ NMR (500MHz,  $\text{CDCl}_3$ ) of 2-(1-(4-Methoxyphenyl)-1H-1, 2, 3-triazol-4-yl)propan-2-ol (Table 3, Entry 3)

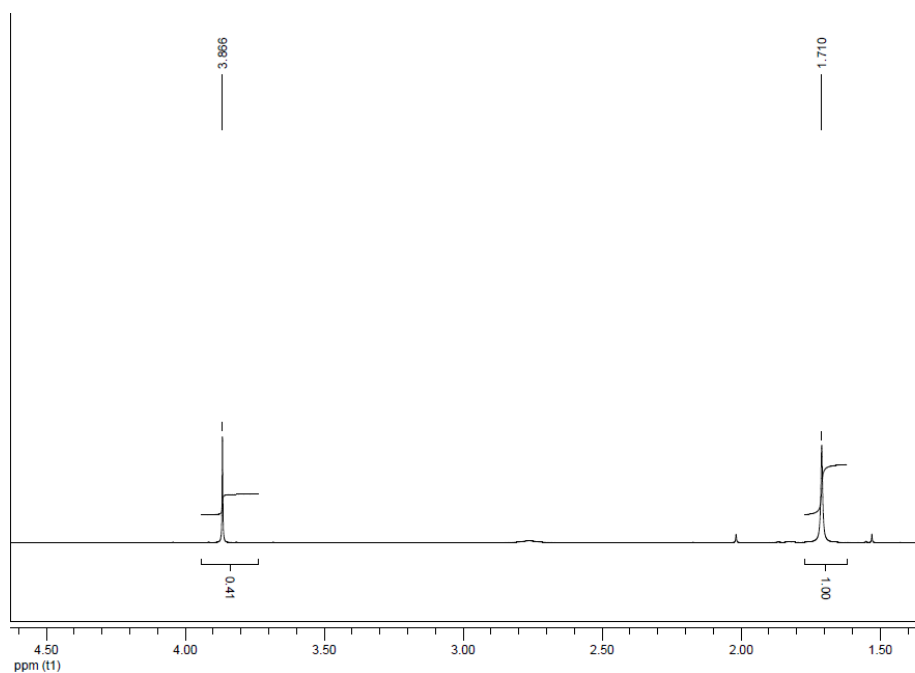

**Fig.12**  $^1\text{H}$ NMR (500MHz,  $\text{CDCl}_3$ ) of 2-(1-(4-Methoxyphenyl)-1H-1, 2, 3-triazol-4-yl)propan-2-ol (Table 3, Entry 3)

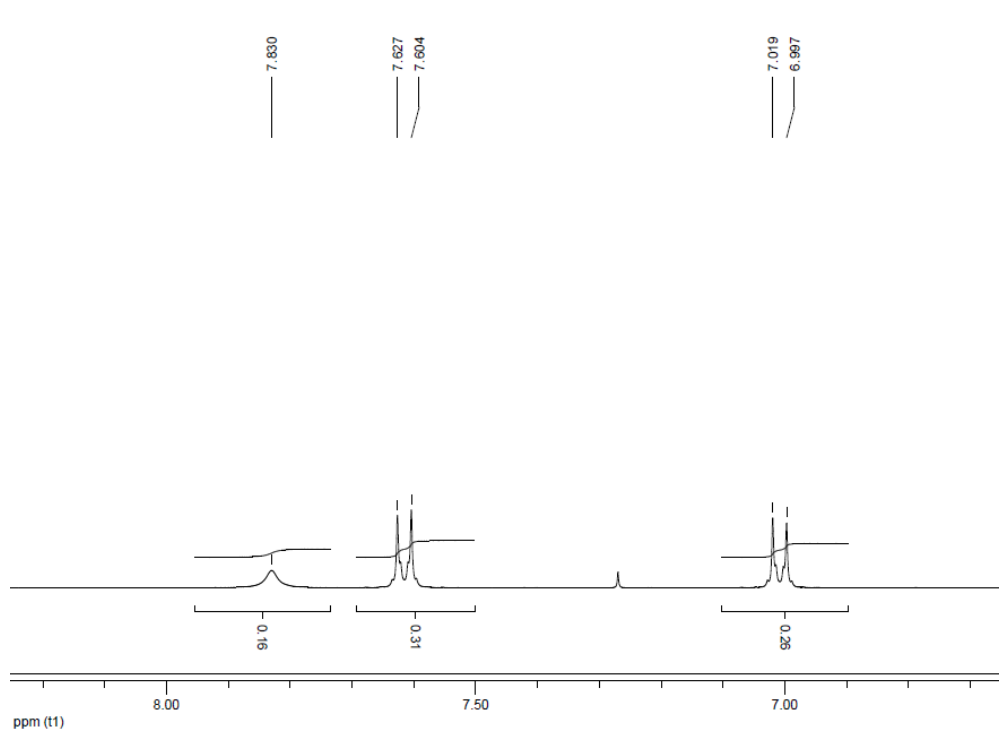

**Fig.13**  $^1\text{H}$ NMR (500MHz,  $\text{CDCl}_3$ ) of 2-(1-(4-Methoxyphenyl)-1H-1, 2, 3-triazol-4-yl)propan-2-ol (Table 3, Entry 3)

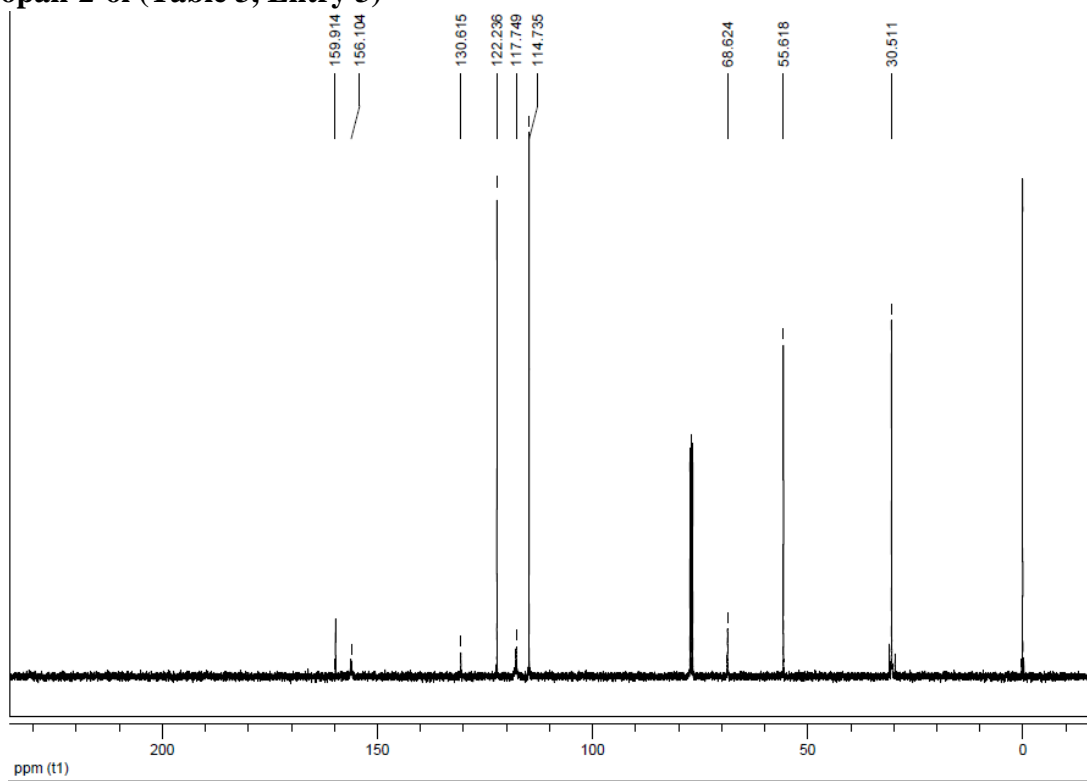

**Fig.14**  $^{13}\text{C}$ NMR (125MHz,  $\text{CDCl}_3$ ) of 2-(1-(4-Methoxyphenyl)-1H-1, 2, 3-triazol-4-yl)propan-2-ol (Table 3, Entry 3)

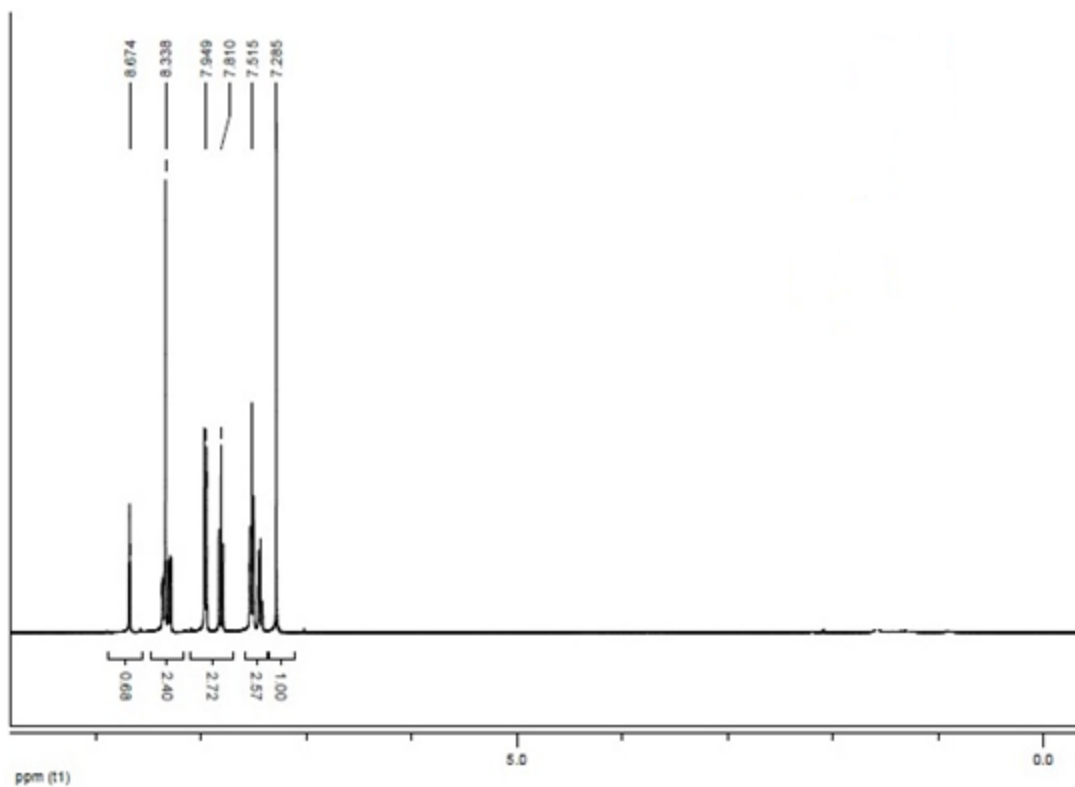

**Fig.15** <sup>1</sup>HNMR (500MHz, CDCl<sub>3</sub>) of 1-(3-Nitrophenyl)-4-phenyl-1H-1, 2, 3-triazole (Table 3, Entry 7)

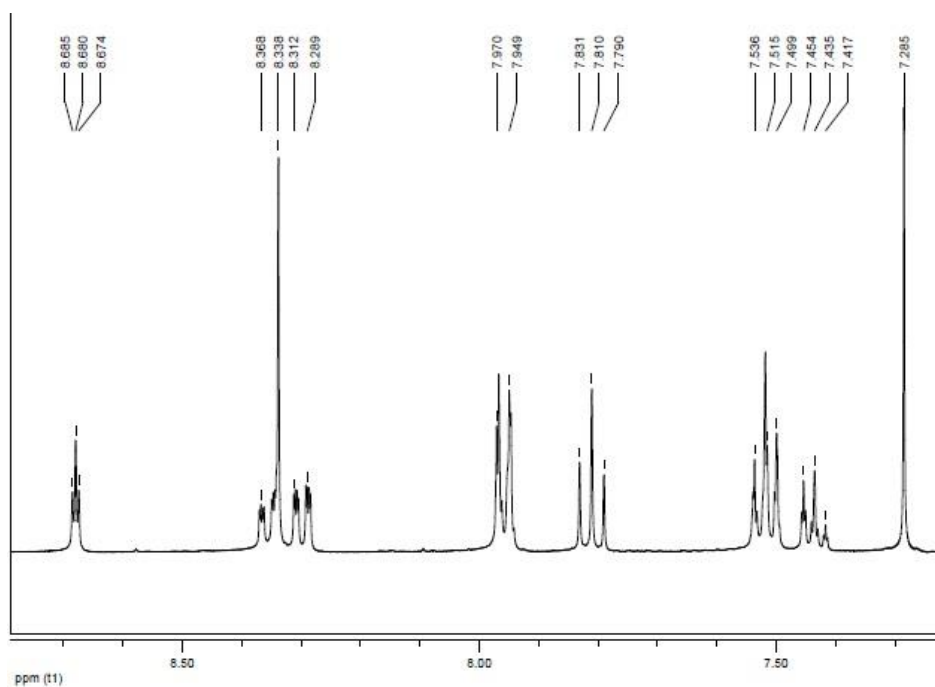

**Fig.16** <sup>1</sup>HNMR (500MHz, CDCl<sub>3</sub>) of 1-(3-Nitrophenyl)-4-phenyl-1H-1, 2, 3-triazole (Table 3, Entry 7)



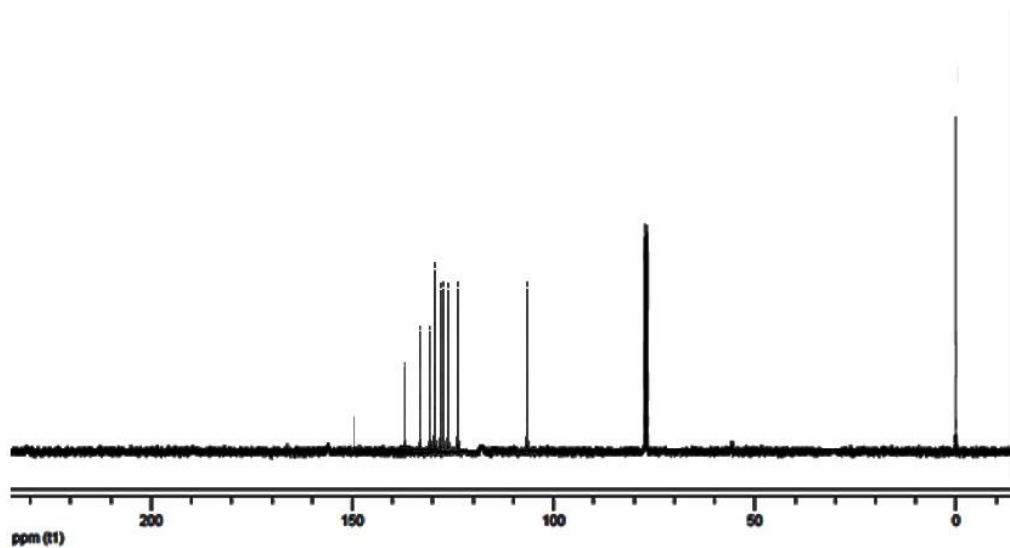

Fig.17  $^{13}\text{C}$ NMR (125MHz,  $\text{CDCl}_3$ ) of 1-(3-Nitrophenyl)-4-phenyl-1H-1, 2, 3-triazole (Table 3, Entry 7)

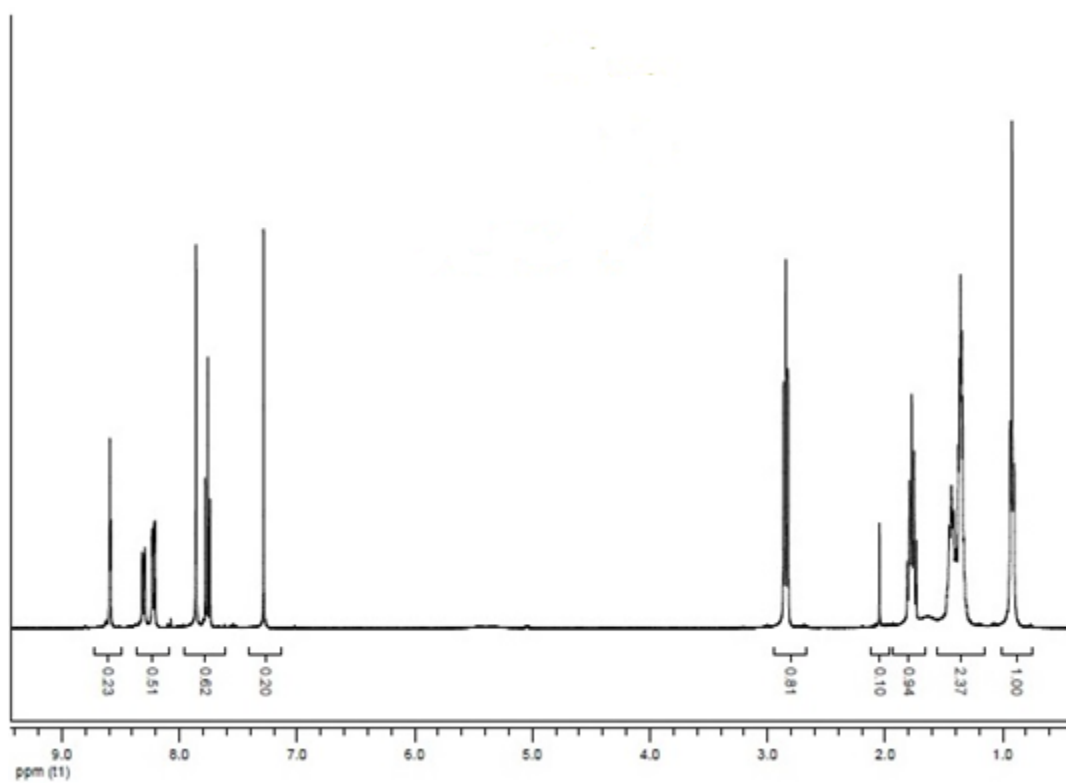

Fig.18  $^1\text{H}$ NMR (500MHz,  $\text{CDCl}_3$ ) of 4-Hexyl-1-(3-nitrophenyl)-1H-1, 2, 3-triazole (Table 3, Entry 8)

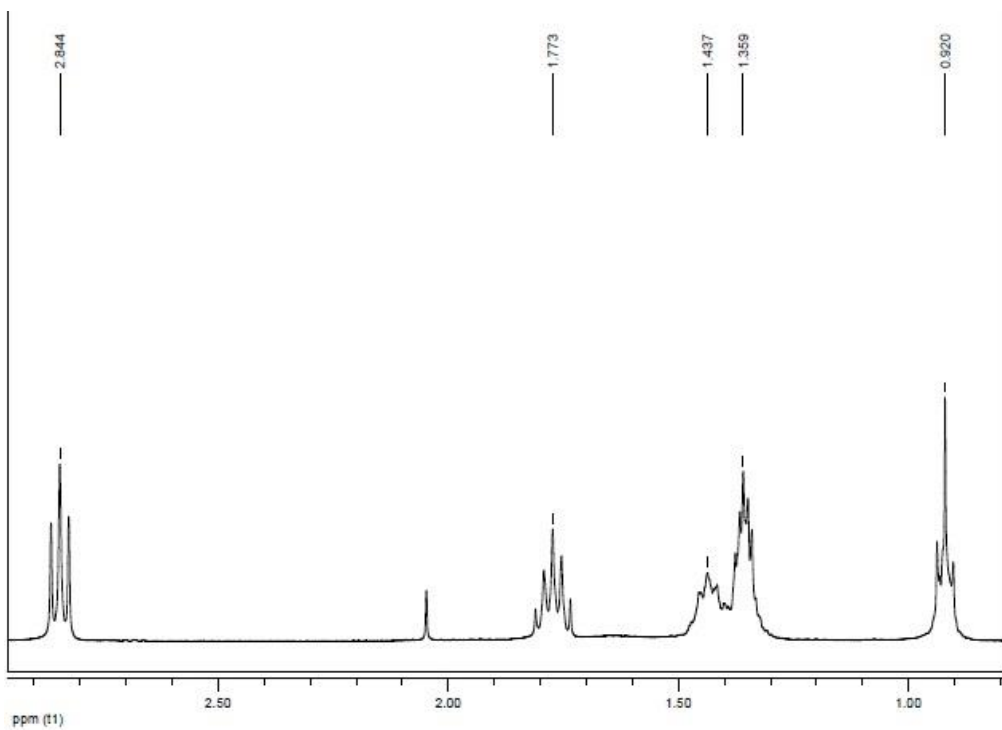

**Fig.19**  $^1\text{H}$ NMR (500MHz,  $\text{CDCl}_3$ ) of 4-Hexyl-1-(3-nitrophenyl)-1H-1, 2, 3-triazole (Table 3, Entry 8)

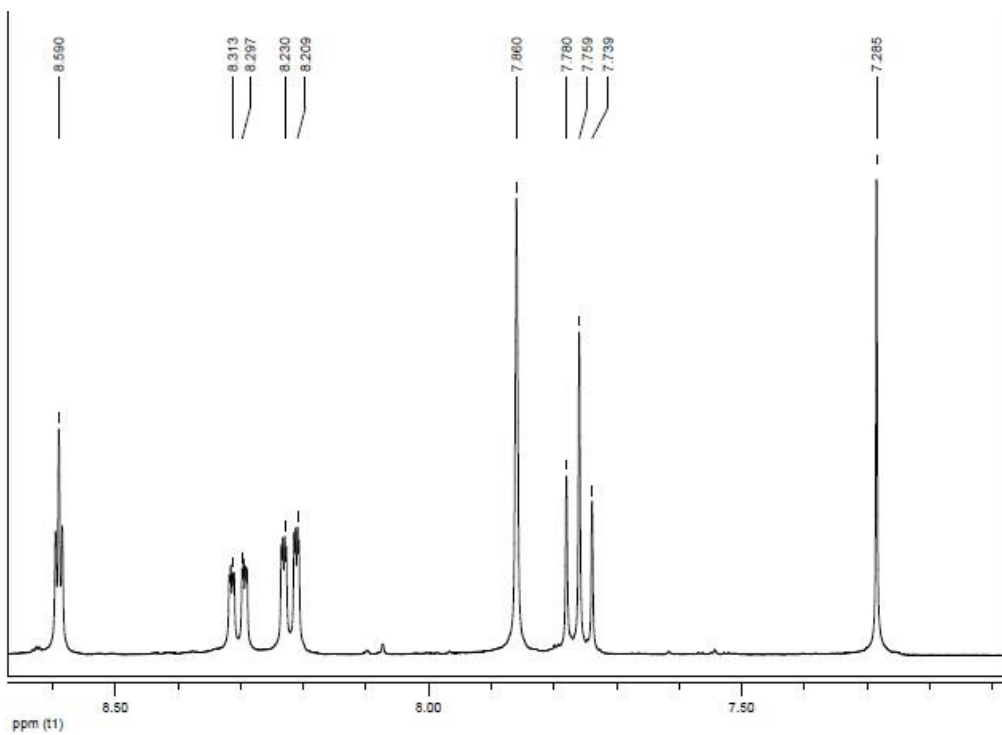

**Fig.20**  $^1\text{H}$ NMR (500MHz,  $\text{CDCl}_3$ ) of 4-Hexyl-1-(3-nitrophenyl)-1H-1, 2, 3-triazole (Table 3, Entry 8)

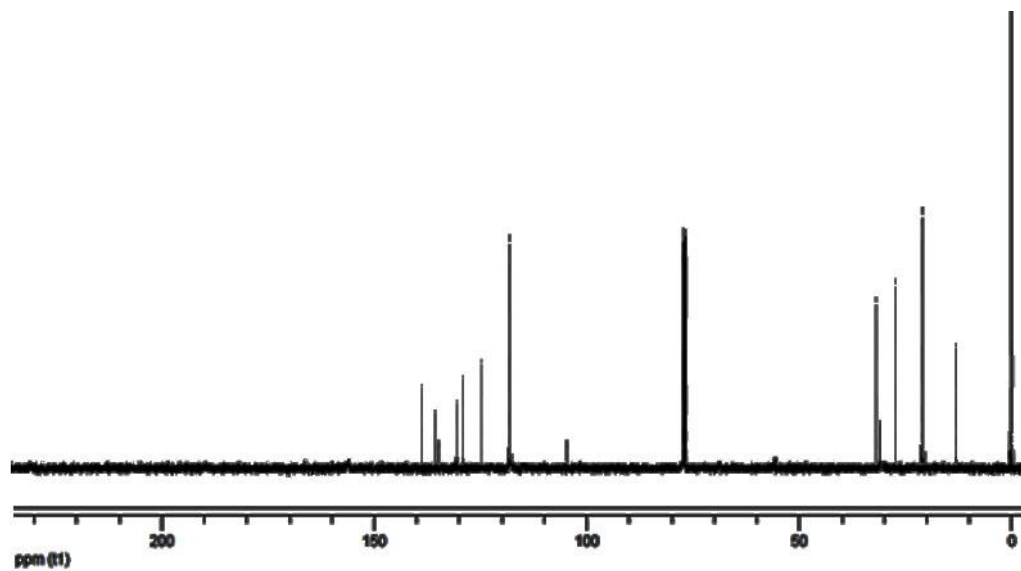

Fig.21  $^{13}\text{C}$ NMR (125MHz,  $\text{CDCl}_3$ ) of 4-Hexyl-1-(3-nitrophenyl)-1H-1, 2, 3-triazole (Table 3, Entry 8)
